# Supplementary material
Source: publisher site journal article supplement (https://www.spandidos-publications.com/6319/downloadSupplementary)

Figure S1. Effect of madanin-1 WT and madanin-1 2S on the viability of (A) SKOV3 and (B) MDA-MB-231 cells. The SKOV3 and MDA-MB-231 cells were treated for 48 h with or without thrombin (2 U/ml) after pretreatment with madanin-1 WT or madanin-1 2S at different concentrations (0-20  $\mu\text{g/ml}$ ) for 1 h. Cell viability was assessed with an MTT assay. The results showed that no significant changes in cell viability were induced in SKOV3 and MDA-MB-231 cells by treatment with madanin-1 WT or madanin-1 2S. Assays were performed in triplicate using cell lines (n=3). Data are expressed as percentages of control values and are presented as the mean  $\pm$  standard deviation. WT, wild-type; 2S, 2 sulfation.

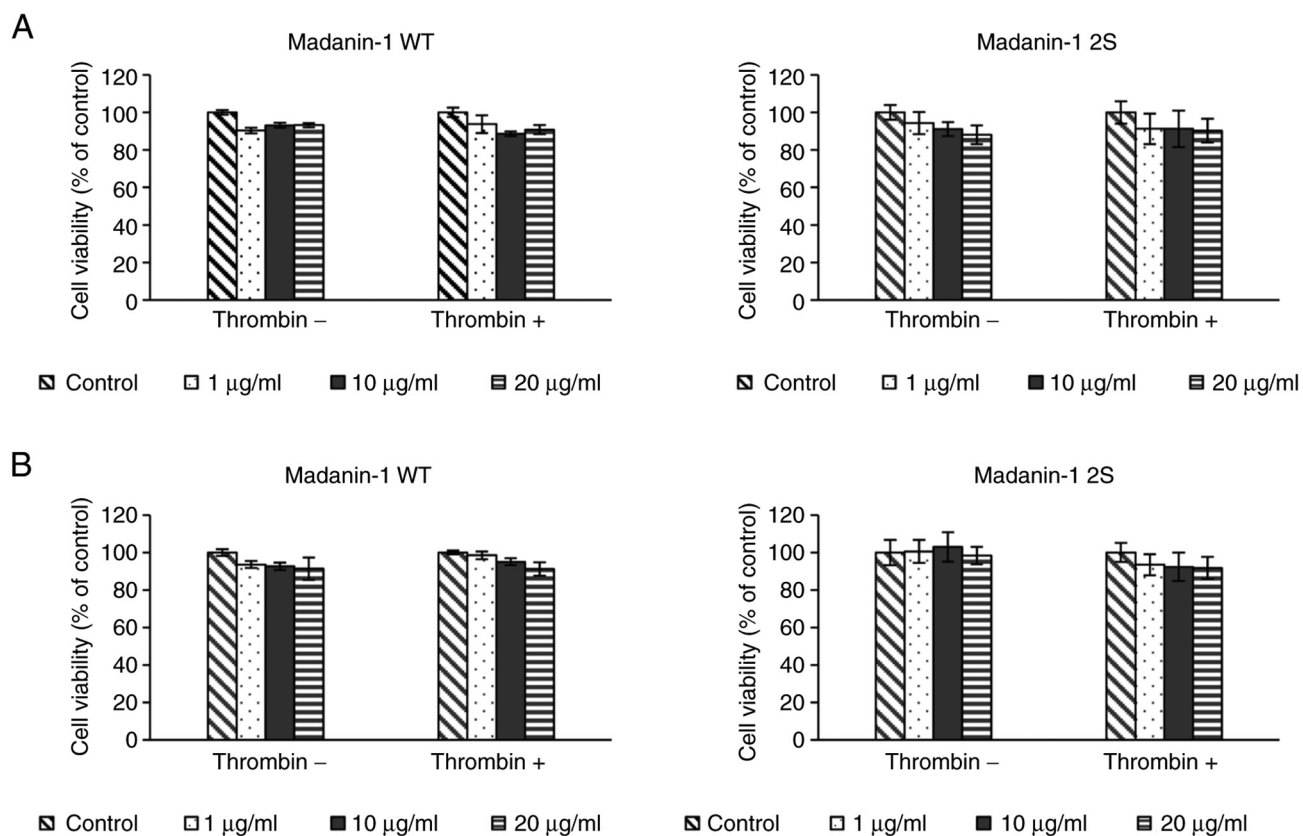

Figure S2. Effect of madanin-1 WT and madanin-1 2S on the apoptosis of SKOV3 cells. The SKOV3 cells were treated for 48 h with or without thrombin (2 U/ml) after pretreatment with (A) madanin-1 WT or (B) madanin-1 2S at different concentrations (0-20  $\mu\text{g/ml}$ ) for 1 h. Apoptosis of SKOV3 cells was analyzed by flow cytometry. The results showed that no significant level of apoptosis was induced in SKOV3 cells by treatment with madanin-1 WT or madanin-1 2S. The percentage of cells is indicated in each quadrant. WT, wild-type; 2S, 2 sulfation.

**A**

Madanin-1 WT

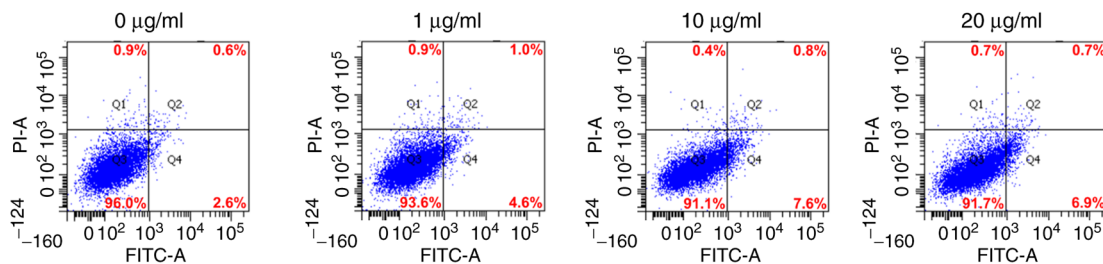

Madanin-1 WT+  
Thrombin (2 U/ml)

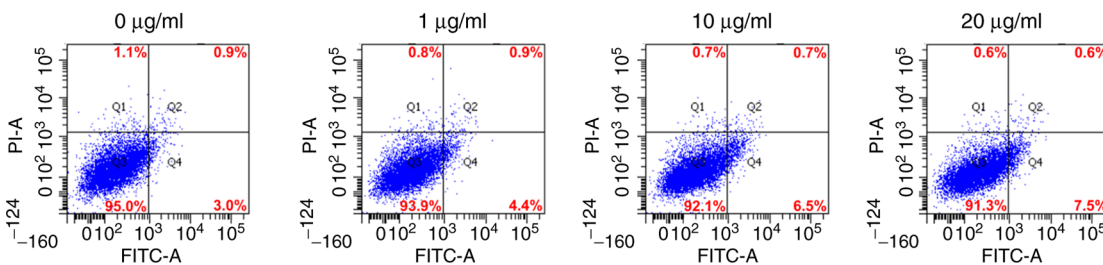

**B**

Madanin-1 2S

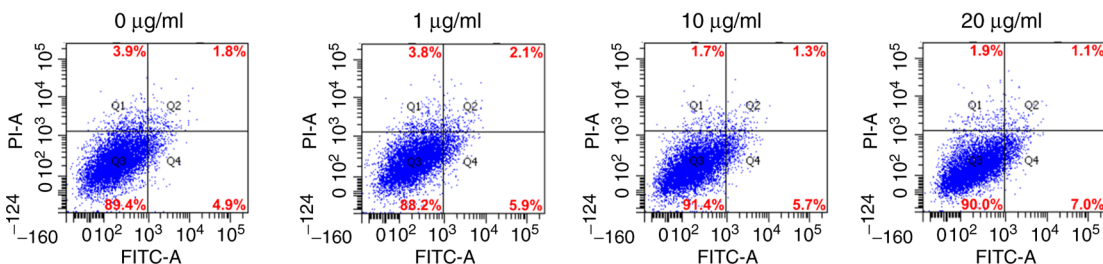

Madanin-1 2S+  
Thrombin (2 U/ml)

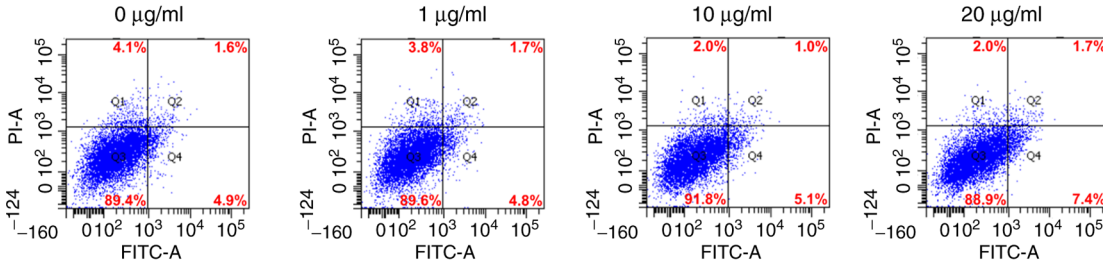

Figure S3. Effect of madanin-1 WT and madanin-1 2S on the apoptosis of MDA-MB-231 cells. The MDA-MB-231 cells were treated for 48 h with or without thrombin (2 U/ml) after pretreatment with (A) madanin-1 WT or (B) madanin-1 2S at different concentrations (0-20  $\mu\text{g/ml}$ ) for 1 h. Apoptosis of MDA-MB-231 cells was analyzed by flow cytometry. The results showed that no significant level of apoptosis was induced in MDA-MB-231 cells by treatment with madanin-1 WT or madanin-1 2S. The percentage of cells is indicated in each quadrant. WT, wild-type; 2S, 2 sulfation.

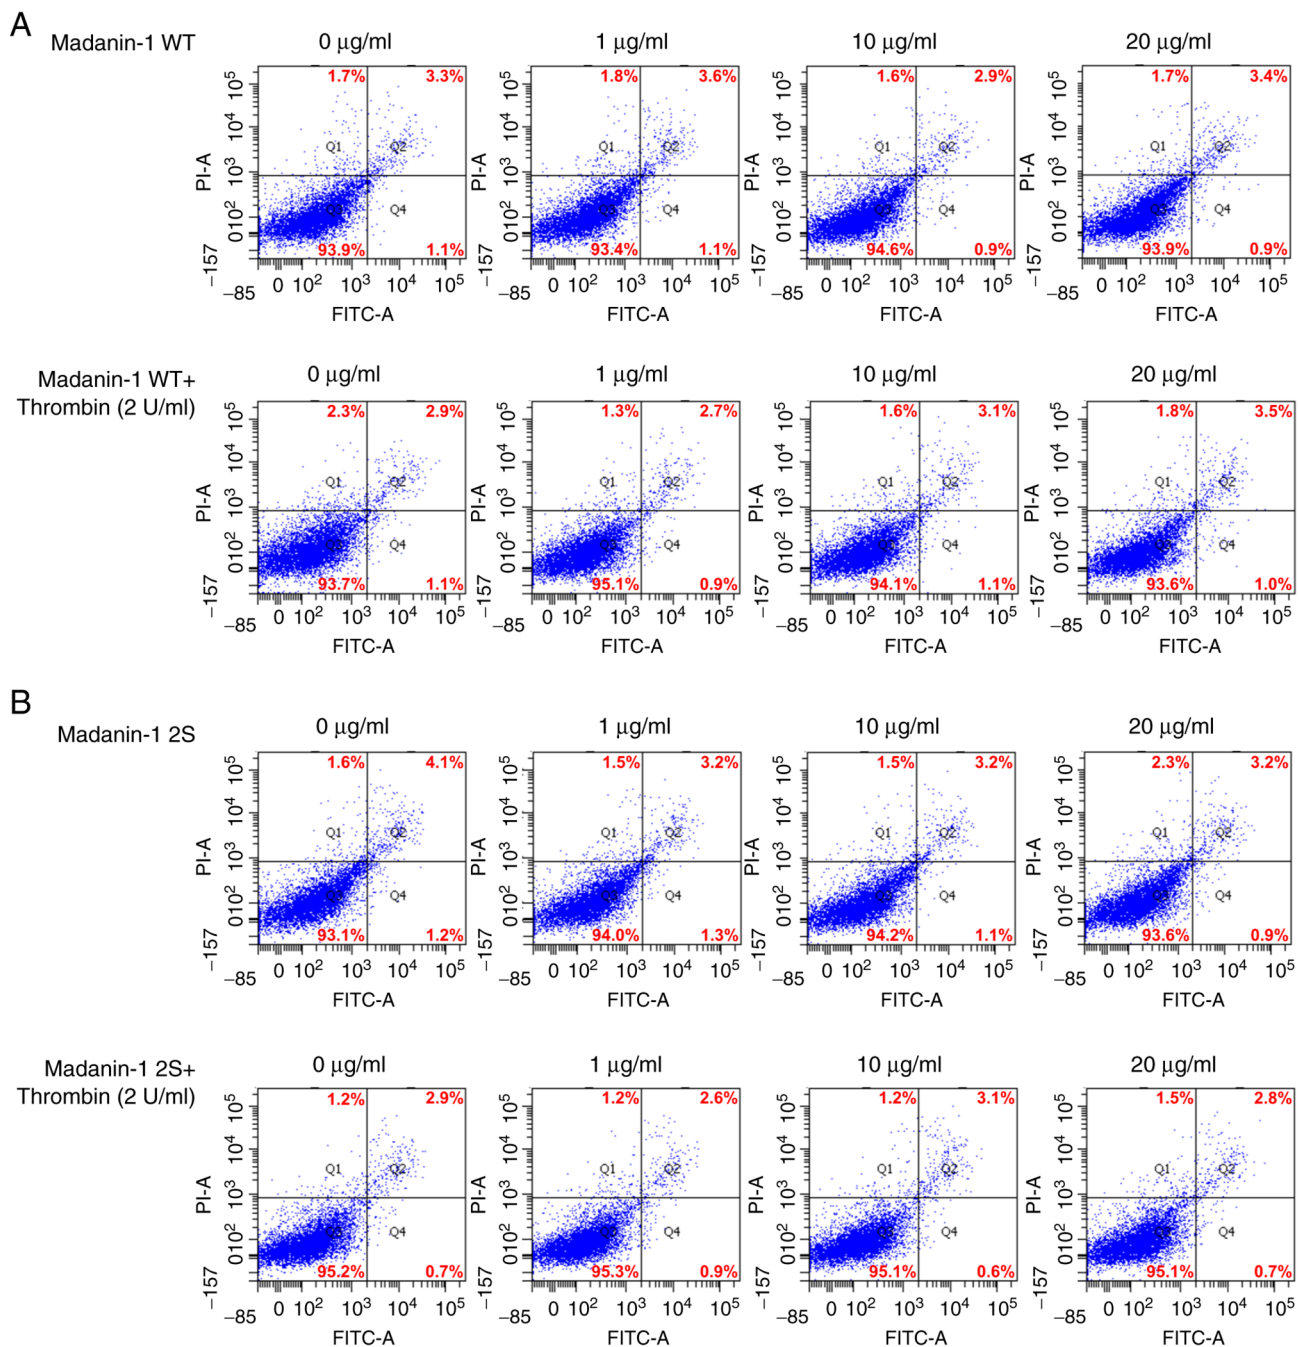

Supplement: Supplementary file 1 [file downloadSupplementary]
